# Supplementary material
Source: MDPI journal article supplement (https://www.mdpi.com/2075-163X/12/11/1473)
Supplement: s1 [file s1]

# Mineralogical and Sedimentological Characterization of the Clay-Rich Sediments from Ases Cave (Cova Dets Ases, Mallorca, Spain): Origin and Classification

Ana Entrena, Joan J. Fornós, Luis F. Auqué, Francesc Gràcia and Elisa Laita

\* Correspondence: [a.entrena.f@gmail.com](mailto:a.entrena.f@gmail.com)

## Supplementary Materials:

**Table S1.** Relative proportions of the mineral phases detected in the whole rock and <2 µm fractions XRD patterns of the sediment samples in Dets Ases Cave.

|              |     | Mineral (%) |     |     |    |       |     |     |     |     |     |     |
|--------------|-----|-------------|-----|-----|----|-------|-----|-----|-----|-----|-----|-----|
|              |     | Qz          | Cal | Dol | Pl | K Fsp | Hem | Gth | Kln | Chl | Ill | Sme |
| Sample label |     |             |     |     |    |       |     |     |     |     |     |     |
| AREA A       | 1AT | <5          | -   | -   | <5 | <5    | <5  | 7   | 32  | -   | 50  | -   |
|              | 2AT | 13          | -   | -   | <5 | <5    | <5  | -   | 28  | 18  | 33  | -   |
|              | 3AT | 21          | -   | -   | <5 | <5    | <5  | 15  | 14  | 10  | 33  | -   |
|              | 4AT | <5          | 49  | <5  | <5 | -     | <5  | -   | 8   | 8   | 24  | -   |
|              | 5AT | 15          | -   | -   | -  | -     | <5  | -   | 16  | 14  | 51  | -   |
|              | 6AS | 9           | -   | -   | <5 | <5    | <5  | 7   | 29  | -   | 47  | -   |
| AREA B       | 1BT | <5          | 79  | -   | -  | -     | <5  | -   | 9   | -   | 11  | -   |
|              | 2BS | 9           | 80  | -   | -  | -     | -   | -   | <5  | <5  | 7   | <5  |
|              | 3BS | 47          | 11  | <5  | <5 | -     | <5  | -   | <5  | <5  | 26  | <5  |
|              | 4BS | 60          | 19  | -   | -  | -     | <5  | -   | <5  | <5  | 14  | <5  |
|              | 5BS | <5          | 95  | -   | -  | -     | -   | -   | <5  | <5  | <5  | -   |
|              | 6BS | 15          | -   | -   | -  | -     | <5  | -   | 15  | 13  | 46  | 8   |
| AREA C       | 1CS | 6           | 86  | <5  | -  | -     | -   | -   | <5  | <5  | <5  | -   |
|              | 2CS | -           | 100 | -   | -  | -     | -   | -   | -   | -   | -   | -   |
|              | 3CS | <5          | 96  | -   | -  | -     | -   | -   | -   | -   | <5  | -   |
|              | 4CS | 15          | 15  | <5  | -  | -     | -   | 5   | 13  | 10  | 35  | 5   |
| AREA D       | 1DT | 5           | -   | -   | -  | -     | <5  | -   | 16  | 13  | 64  | -   |
|              | 2DT | 41          | 24  | 11  | -  | -     | -   | -   | <5  | <5  | 19  | -   |
|              | 3DT | -           | 97  | <5  | -  | -     | -   | -   | <5  | -   | <5  | -   |
|              | 4DT | 46          | 31  | 8   | <5 | -     | -   | -   | <5  | <5  | 10  | -   |
|              | 5DT | 6           | -   | -   | -  | -     | <5  | -   | 19  | 17  | 55  | -   |
|              | 6DT | 8           | <5  | -   | -  | -     | <5  | -   | 15  | 13  | 60  | -   |
|              | 7DT | 5           | -   | -   | -  | -     | <5  | -   | 14  | 14  | 65  | -   |
|              | 8DT | 8           | 5   | -   | -  | -     | <5  | -   | 15  | 15  | 55  | -   |
| AREA E       | 1ES | 16          | 7   | -   | -  | -     | <5  | <5  | 19  | 10  | 42  | -   |
|              | 2ES | 77          | <5  | -   | -  | <5    | -   | <5  | <5  | <5  | 14  | -   |
|              | 3ES | 42          | 30  | -   | -  | <5    | -   | <5  | <5  | <5  | 18  | -   |
|              | 4ES | 32          | 46  | <5  | -  | <5    | -   | <5  | <5  | <5  | 12  | <5  |

|         |    |    |   |    |    |   |    |    |    |    |    |
|---------|----|----|---|----|----|---|----|----|----|----|----|
| 5ES     | 46 | -  | - | -  | <5 | - | <5 | 6  | 6  | 37 | -  |
| 6ES     | 65 | 21 | - | <5 | <5 | - | -  | <5 | <5 | 9  | <5 |
| SOIL    | 45 | 20 | - | -  | <5 | - | <5 | 8  | -  | 23 | -  |
| BEDROCK | <5 | 97 | - | -  | -  | - | -  | <5 | -  | <5 | -  |

**Table S2.** Kaolinite crystallinity in the sediments from Dets Ases Cave measured in air-dried oriented aggregates.

| AREA           | Sample label | KC AD (001) | Average |
|----------------|--------------|-------------|---------|
| <b>A</b>       | 1AT          | 0.26        | 0.27    |
|                | 2AT          | 0.21        |         |
|                | 3AT          | 0.28        |         |
|                | 4AT          | -           |         |
|                | 5AT          | 0.332       |         |
|                | 6AS          | 0.33        |         |
| <b>B</b>       | 1BT          | 0.38        | 0.33    |
|                | 2BS          | 0.25        |         |
|                | 3BS          | 0.31        |         |
|                | 4BS          | 0.26        |         |
|                | 5BS          | 0.36        |         |
|                | 6BS          | 0.35        |         |
| <b>C</b>       | 1CS          | 0.3         | 0.29    |
|                | 2CS          | 0.26        |         |
|                | 3CS          | 0.33        |         |
|                | 4CS          | 0.25        |         |
| <b>D</b>       | 1DT          | 0.43        | 0.35    |
|                | 2DT          | 0.32        |         |
|                | 3DT          | 0.28        |         |
|                | 4DT          | 0.25        |         |
|                | 5DT          | 0.44        |         |
|                | 6DT          | 0.53        |         |
|                | 7DT          | 0.34        |         |
|                | 8DT          | 0.21        |         |
| <b>E</b>       | 1ES          | 0.34        | 0.32    |
|                | 2ES          | 0.29        |         |
|                | 3ES          | 0.29        |         |
|                | 4ES          | 0.37        |         |
|                | 5ES          | 0.29        |         |
|                | 6ES          | 0.33        |         |
| <b>SOIL</b>    |              | 0.37        |         |
| <b>BEDROCK</b> |              | 0.12        |         |

**Table S3.** Grain size analysis of Des Ases cave; statistical results, classification and general composition.

| AREA A                     |       |      |      |      |      |      |
|----------------------------|-------|------|------|------|------|------|
|                            | 1AT   | 2AT  | 3AT  | 4AT  | 5AT  | 6AT  |
| <b>SAMPLE TYPE:</b>        | Bi    | Bi   | Uni  | Bi   | Uni  | Uni  |
| <b>MEAN</b>                | 6.75  | 4.09 | 3.63 | 0.13 | 4.17 | 3.40 |
| <b>SORTING</b>             | 2.66  | 2.89 | 2.20 | 0.82 | 2.45 | 2.25 |
| <b>SKEWNESS</b>            | -0.31 | 0.54 | 0.31 | 0.04 | 0.38 | 0.43 |
| <b>KURTOSIS</b>            | 0.68  | 0.71 | 1.13 | 0.88 | 0.92 | 1.15 |
| <b>D<sub>50</sub> (φ):</b> | 7.45  | 2.92 | 3.26 | 0.12 | 3.57 | 2.85 |
| <b>% GRAVEL:</b>           | 0     | 0    | 0.1  | 6.2  | 0    | 0    |
| <b>% SAND:</b>             | 23    | 60.4 | 63.8 | 93.8 | 56.5 | 69.7 |
| <b>% MUD:</b>              | 77    | 39.6 | 36.2 | 0    | 43.5 | 30.3 |

  

| AREA B                     |      |      |       |      |      |      |
|----------------------------|------|------|-------|------|------|------|
|                            | 1BT  | 2BS  | 3BS   | 4BS  | 5BS  | 6BS  |
| <b>SAMPLE TYPE:</b>        | Bi   | Poly | Uni   | Uni  | Uni  | Bi   |
| <b>MEAN</b>                | 4.18 | 3.99 | 6.58  | 4.68 | 1.72 | 4.46 |
| <b>SORTING</b>             | 3.36 | 2.95 | 2.21  | 1.82 | 2.00 | 2.62 |
| <b>SKEWNESS</b>            | 0.23 | 0.44 | -0.16 | 0.22 | 0.49 | 0.37 |
| <b>KURTOSIS</b>            | 0.74 | 0.83 | 1.04  | 1.19 | 1.21 | 0.91 |
| <b>D<sub>50</sub> (φ):</b> | 3.60 | 3.01 | 6.78  | 4.48 | 1.15 | 3.76 |
| <b>% GRAVEL:</b>           | 0.3  | 0.1  | 0     | 0    | 0.2  | 0    |
| <b>% SAND:</b>             | 53.7 | 69.9 | 13.9  | 37.4 | 84.1 | 53.7 |
| <b>% MUD:</b>              | 46   | 30.0 | 86.1  | 62.6 | 15.7 | 46.3 |

  

| AREA C                     |      |      |      |      |
|----------------------------|------|------|------|------|
|                            | 1CS  | 2CS  | 3CS  | 4CS  |
| <b>SAMPLE TYPE:</b>        | Bi   | Bi   | Bi   | Uni  |
| <b>MEAN</b>                | 2.78 | 2.88 | 2.97 | 2.11 |
| <b>SORTING</b>             | 1.92 | 2.17 | 2.25 | 2.26 |
| <b>SKEWNESS</b>            | 0.43 | 0.40 | 0.48 | 0.42 |
| <b>KURTOSIS</b>            | 1.19 | 0.93 | 0.82 | 1.19 |
| <b>D<sub>50</sub> (φ):</b> | 2.28 | 2.29 | 2.20 | 1.56 |
| <b>% GRAVEL:</b>           | 0    | 0.1  | 0    | 0.5  |
| <b>% SAND:</b>             | 77   | 70.8 | 68.4 | 79.7 |
| <b>% MUD:</b>              | 23   | 29.1 | 31.6 | 19.7 |

  

| AREA D                     |      |      |      |      |      |       |      |      |
|----------------------------|------|------|------|------|------|-------|------|------|
|                            | 1DT  | 2DT  | 3DT  | 4DT  | 5DT  | 6DT   | 7DT  | 8DT  |
| <b>SAMPLE TYPE:</b>        | Bi   | Uni  | Uni  | Bi   | Poly | Bi    | Bi   | Bi   |
| <b>MEAN</b>                | 4.07 | 3.89 | 2.53 | 2.97 | 4.31 | 6.14  | 3.80 | 4.19 |
| <b>SORTING</b>             | 2.90 | 2.26 | 2.16 | 2.36 | 3.06 | 3.13  | 2.91 | 3.19 |
| <b>SKEWNESS</b>            | 0.50 | 0.17 | 0.33 | 0.43 | 0.53 | -0.36 | 0.57 | 0.41 |
| <b>KURTOSIS</b>            | 0.70 | 0.97 | 0.87 | 0.97 | 0.65 | 0.64  | 0.88 | 0.72 |
| <b>D<sub>50</sub> (φ):</b> | 2.98 | 3.71 | 2.07 | 2.34 | 3.04 | 7.06  | 2.56 | 3.11 |
| <b>% GRAVEL:</b>           | 0    | 0    | 0    | 0    | 0    | 0     | 0    | 0    |
| <b>% SAND:</b>             | 0.6  | 0.6  | 0.7  | 0.6  | 0.6  | 0.3   | 0.7  | 0.6  |

|                         |                            |            |            |            |            |            |       |     |
|-------------------------|----------------------------|------------|------------|------------|------------|------------|-------|-----|
| <b>% MUD:</b>           | 0.4                        | 0.5        | 0.3        | 0.4        | 0.4        | 0.7        | 0.3   | 0.4 |
| <b>SAMPLE<br/>TYPE:</b> | <b>AREA E</b>              |            |            |            |            |            |       |     |
|                         | <b>1ES</b>                 | <b>2ES</b> | <b>3ES</b> | <b>4ES</b> | <b>5ES</b> | <b>6ES</b> |       |     |
|                         | Poly                       | Uni        | Bi         | Bi         | Poly       | Poly       |       |     |
|                         | MEAN                       | 5.04       | 6.00       | 5.86       | 4.58       | 4.74       | 5.40  |     |
|                         | SORTING                    | 3.40       | 1.72       | 3.24       | 3.47       | 3.45       | 2.71  |     |
|                         | SKEWNESS                   | -0.07      | 0.27       | -0.35      | -0.19      | -0.10      | 0.05  |     |
|                         | KURTOSIS                   | 0.73       | 1.08       | 1.06       | 0.90       | 0.72       | 1.25  |     |
|                         | <b>D<sub>50</sub> (φ):</b> | 26.86      | 19.13      | 9.620      | 26.98      | 29.46      | 28.59 |     |
| <b>% GRAVEL:</b>        | 0.2                        | 0          | 0.2        | 0.7        | 0.3        | 0.2        |       |     |
| <b>% SAND:</b>          | 39.1                       | 8.4        | 21.8       | 35.6       | 40.5       | 26.2       |       |     |
| <b>% MUD:</b>           | 60.7                       | 91.6       | 78.0       | 63.7       | 59.2       | 73.6       |       |     |
